# Supplementary material for: Intra-event evolution of elemental and ionic concentrations in wet deposition in an urban environment
Source: Copernicus journal article supplement (doi:10.5194/egusphere-2023-1022), 2023-06-08
Supplement: Supplementary file 1 [file egusphere-2023-1022-supplement.pdf]

## Supplement S1

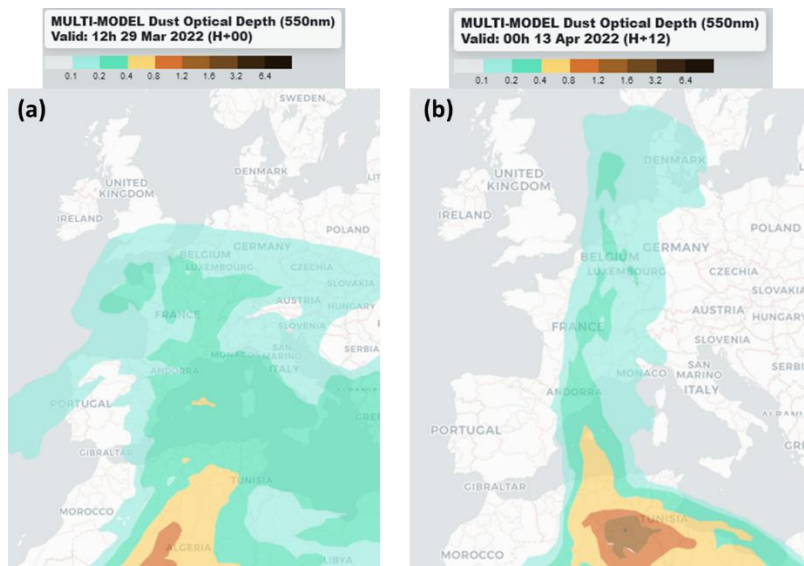

Figure S1. Dust aerosol optical depth (AOD) multi-model simulation provided by the WMO Barcelona Dust Regional Centre from North Africa to Western Europe (<https://dust.aemet.es>, Basart et al., 2019) for (a) 29 March 2022 at 12h00 and (b) 13 April 2022 at 00h00.

## Supplement S2

Table S2. Washout ratios of elements for the selected rain events R2, R3 and R8

| Element | Al    | Ba    | Ca    | Cl     | Co    | Cr    | Fe    | K     | Mg    | Mn    | Na     | P      | S     | Si    | Ti    | Zn    |
|---------|-------|-------|-------|--------|-------|-------|-------|-------|-------|-------|--------|--------|-------|-------|-------|-------|
| R2      | 1 699 | 827   | 2 580 | 3 058  | 1 278 | 485   | 617   | 1 835 | 1 449 | 1 219 | 1 625  | 5 291  | 2 630 | 2 056 | 2 492 | 1 029 |
| R3      | 4 436 | 2 566 | 9 775 | 69 618 | 6 272 | 3 194 | 3 806 | 4 701 | 7 793 | 4 733 | 11 119 | 16 699 | 3 223 | 5 423 | 7 342 | 3 792 |
| R8      | 3 819 | 1 298 | 5 472 | 14 402 | 917   | 483   | 1 555 | 3 606 | 4 183 | 2 009 | 3 002  | 2 966  | 4 444 | 3 579 | 3 699 | 2 327 |

## Supplement S3

Table S3. Mass median diameter (MMD) of elements (Elichegaray, 1980 and Koutrakis, 1984 in Jaffrezo and Colin, 1988) and mean washout ratios for selected rain events (R2, R4 and R8) compared to WR of Jaffrezo and Colin (1988).

| Element | MMD ( $\mu\text{m}$ ) | WR R2 | WR R3  | WR R8 | WR Jaffrezo and Colin, 1988 |
|---------|-----------------------|-------|--------|-------|-----------------------------|
| Cl      | 0.6                   | 1 648 | 65 016 | 1 746 | 2 941                       |
| K       | 0.7                   | 835   | 3 256  | 706   | 951                         |
| Zn      | 1.0                   | 265   | 1 469  | 384   | 767                         |
| S       | 1.1                   | 1 093 | 2 791  | 654   | 743                         |
| Na      | 1.6                   | 936   | 11 588 | 379   | 444                         |
| Mg      | 1.7                   | 425   | 6 027  | 587   | 596                         |
| Mn      | 1.8                   | 316   | 2 071  | 366   | 146                         |
| Fe      | 2.3                   | 110   | 1 403  | 324   | 184                         |
| Al      | 3.3                   | 261   | 1 954  | 625   | 291                         |
| Ti      | 3.3                   | 321   | 2 447  | 615   | 305                         |
| Si      | 3.4                   | 292   | 2 051  | 564   | 373                         |
| Ca      | 4.7                   | 587   | 4 158  | 790   | 1 048                       |

## Supplement S4

**Table S4.** Decrease Factor (DF), which correspond to the ratio of the mass concentration of the first fraction to the last fraction, of the particulate and dissolved phases and the ratio of the decrease factor of the particulate to the dissolved phase.

| Rain event | DF for particulate phase | DF for dissolved phase | DF particulate /DF dissolved |
|------------|--------------------------|------------------------|------------------------------|
| R1         | 28.7                     | 16.5                   | 1.7                          |
| R2         | 19.9                     | 2.7                    | 7.3                          |
| R3         | 3.6                      | 1.5                    | 2.3                          |
| R4         | 49.3                     | 22.1                   | 2.2                          |
| R5         | 3.6                      | 1.8                    | 2.0                          |
| R6         | 5.3                      | 1.9                    | 2.8                          |
| R7         | 10.5                     | 2.6                    | 4.0                          |
| R8         | 15.0                     | 10.9                   | 1.4                          |

## Supplement S5

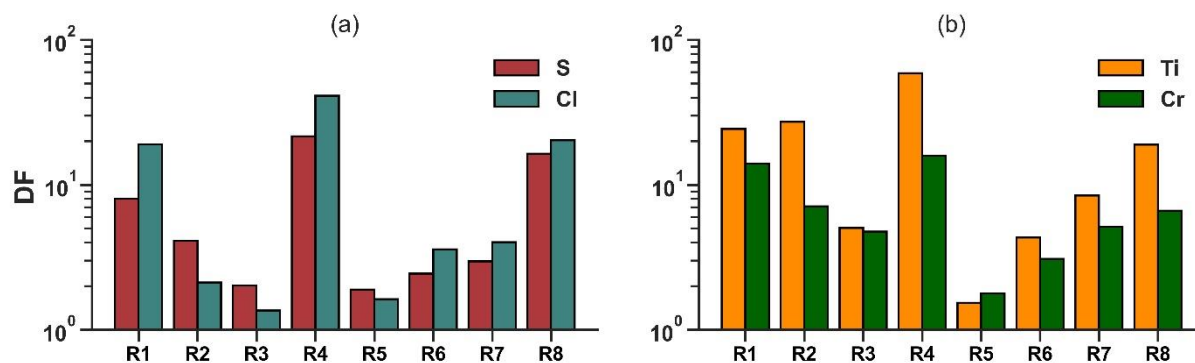

**Figure S5.** Decrease Factor (DF), which correspond to the ratio of the mass concentration of the first fraction to the last fraction, of (a) Cl in blue and S in red, and (b) of Ti in orange and Cr in green.

## Supplement S6

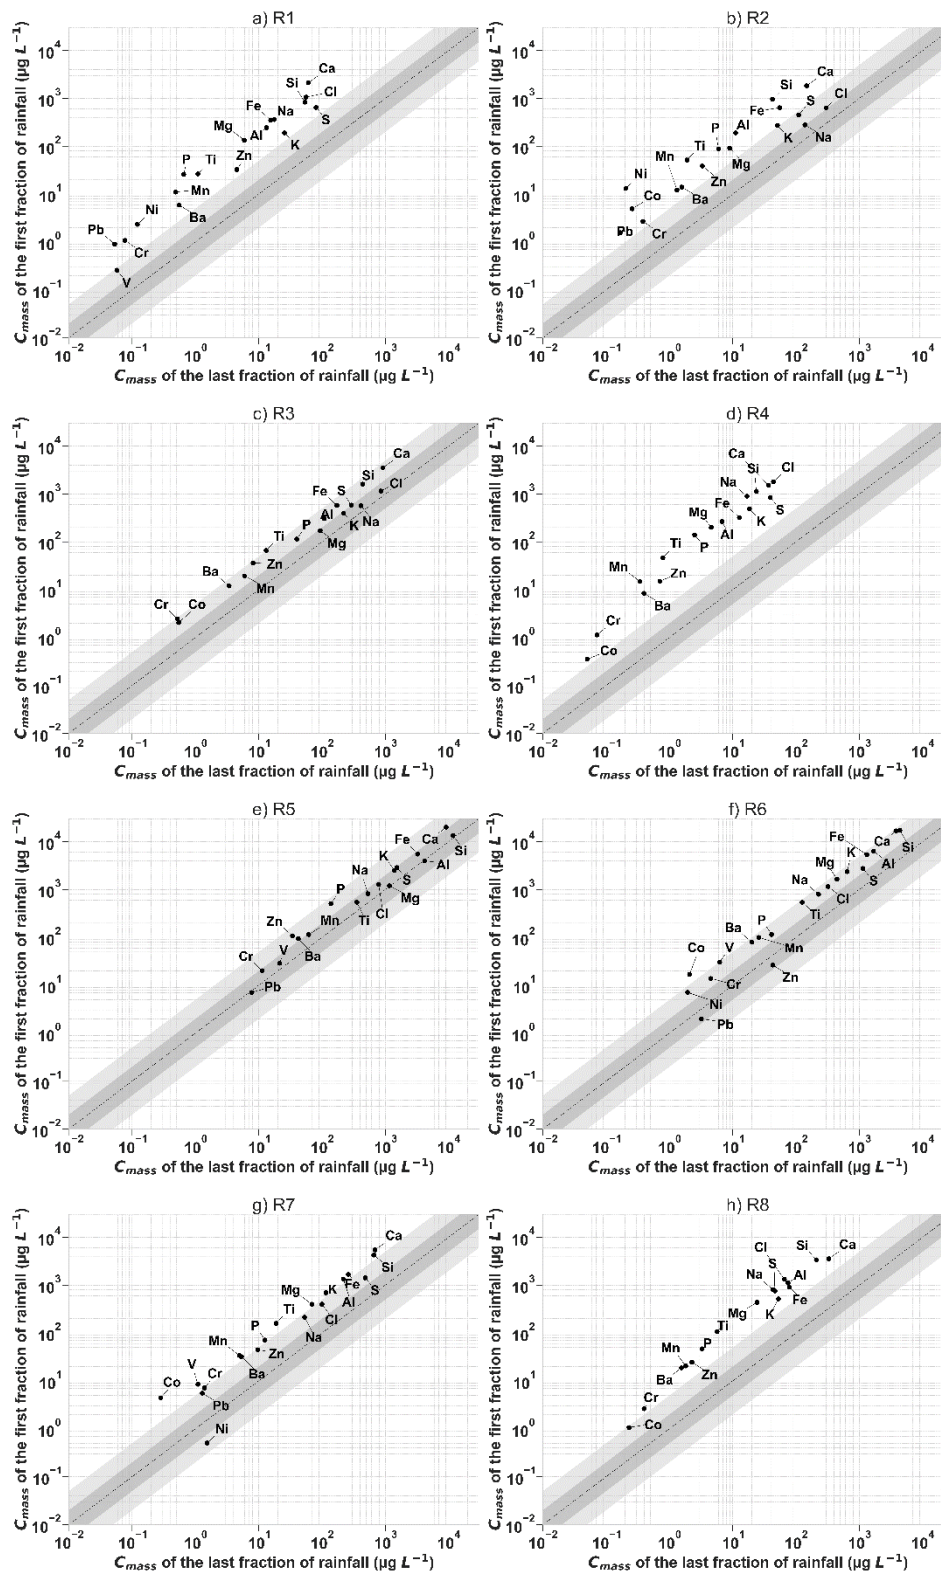

**Figure S6.** Element mass concentration in the first fraction of rainfall as a function of elemental mass concentration in the last fraction of (a) R1, (b) R2, (c) R3, (d) R4, (e) R5, (f) R6, (g) R7 and (h) R8. The dotted line represents a 1:1 fit, while the dark and light grey envelopes represent a factor 2 and 5 deviation, respectively.

## References

Basart, S., Nickovic, S., Terradellas, E., Cuevas, E., García-Pando, C. P., García-Castrillo, G., Werner, E., and Benincasa, F.: The WMO SDS-WAS Regional Center for Northern Africa, Middle East and Europe, E3S Web Conf., 99, 04008, <https://doi.org/10.1051/e3sconf/20199904008>, 2019.

Elichegaray, C.: Contribution à l'étude du comportement physico-chimique de l'aérosol urbain, PhD Thesis, Université Paris VII, Paris, 1980.

Jaffrezo, J.-L. and Colin, J.-L.: Rain-aerosol coupling in urban area: Scavenging ratio measurement and identification of some transfer processes, *Atmospheric Environment* (1967), 22, 929–935, [https://doi.org/10.1016/0004-6981\(88\)90270-3](https://doi.org/10.1016/0004-6981(88)90270-3), 1988.

Koutrakis, P.: Physico-chimie de l'aerosol urbain: identification et quantification des principales sources par analyse multivariable, PhD Thesis, Université Paris XII - Val de Marne, 1984.
